# Supplementary material
Source: PubMed Central journal article supplement (PMC4127346)

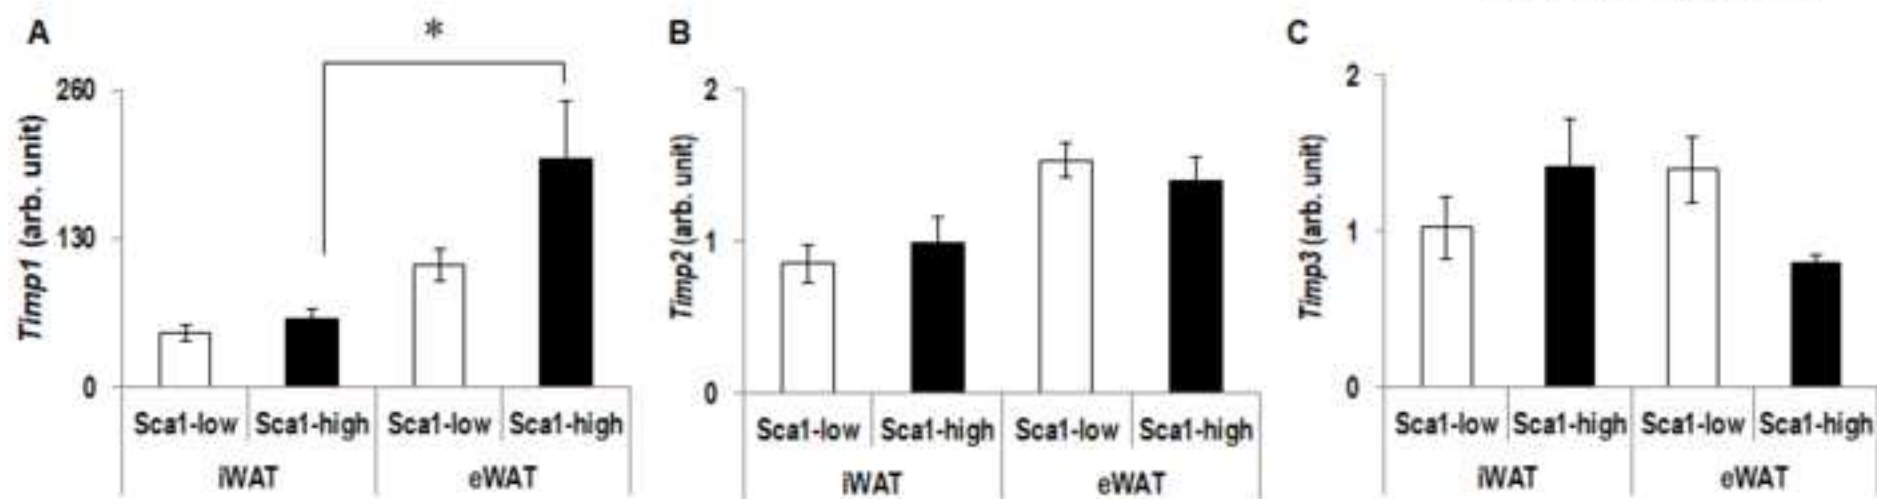

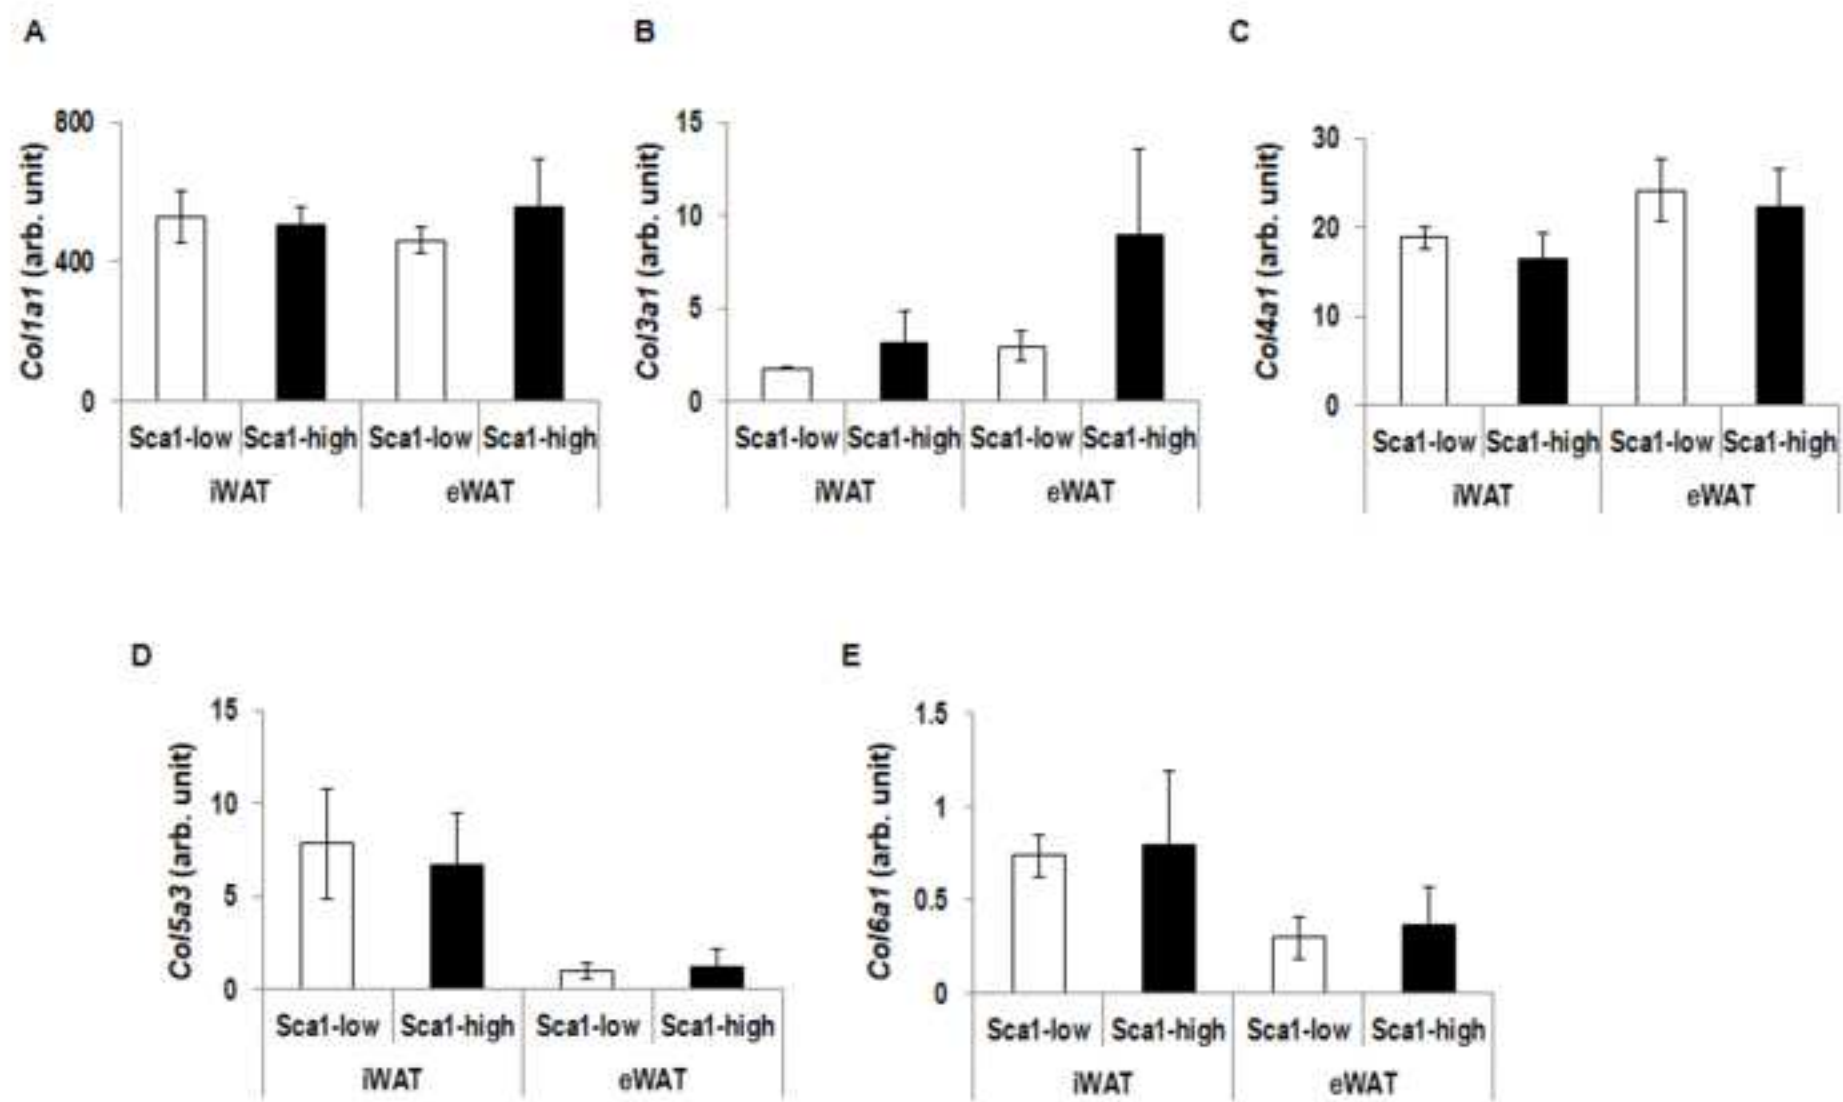

Supplement: NIHMS585637-supplement-07.pdf [file NIHMS585637-supplement-07.pdf]
